# Supplementary material for: Next-Generation Sequencing of Pulmonary Large Cell Neuroendocrine Carcinoma Reveals Small Cell Carcinoma–like and Non–Small Cell Carcinoma–like Subsets
Source: Oxford University Press journal article supplement (doi:10.1158/1078-0432.ccr-15-2946), 2016-03-09
Supplement: 10780432ccr152946-sup-159141_1_supp_3352541_z2ddzz.docx [file 10780432ccr152946-sup-159141_1_supp_3352541_z2ddzz.docx]

**Supplementary Table 4: Complete list of mutations and copy number alterations detected by MSK-IMPACT in 45 LCNECs**

**Complete list of mutations**

| **Sample ID** | **Gene** | **Protein Change** | **Type** | **Allele Freq** | **Copy #** |
| --- | --- | --- | --- | --- | --- |
| LCNEC-25 | ALK | G689V | Missense | 0.13 | Diploid |
| LCNEC-25 | ATM | R221I | Missense | 0.11 | Diploid |
| LCNEC-25 | CDK12 | E1171Q | Missense | 0.25 | Diploid |
| LCNEC-25 | FAT1 | Q4085* | Nonsense | 0.09 | Diploid |
| LCNEC-25 | GRIN2A | L1405fs | Frameshift | 0.19 | Diploid |
| LCNEC-25 | HRAS | G151E | Missense | 0.26 | Diploid |
| LCNEC-25 | INPP4B | L271I | Missense | 0.13 | Diploid |
| LCNEC-25 | KDM5C | R1069I | Missense | 0.21 | NA |
| LCNEC-25 | KEAP1 | Q282* | Nonsense | 0.26 | Diploid |
| LCNEC-25 | KMT2C | V375L | Missense | 0.05 | Diploid |
| LCNEC-25 | MED12 | 2059_2059Q>QQ | Insertion | 0.22 | NA |
| LCNEC-25 | MITF | V168I | Missense | 0.18 | Diploid |
| LCNEC-25 | PIK3CB | A524S | Missense | 0.21 | Diploid |
| LCNEC-25 | POLE | S193I | Missense | 0.12 | Diploid |
| LCNEC-25 | REL | Y6C | Missense | 0.23 | Diploid |
| LCNEC-25 | TP53 | Y205C | Missense | 0.29 | Diploid |
| LCNEC-25 | TSHR | C408R | Missense | 0.16 | Diploid |
| LCNEC-26 | BCOR | A172fs | Frameshift | 0.25 | NA |
| LCNEC-26 | ERCC2 | R343L | Missense | 0.22 | Diploid |
| LCNEC-26 | NFE2L2 | G81C | Missense | 0.34 | Diploid |
| LCNEC-26 | NOTCH4 | D1388N | Missense | 0.32 | Diploid |
| LCNEC-26 | NTRK3 | G520R | Missense | 0.2 | Diploid |
| LCNEC-27 | AKT3 | W463R | Missense | 0.21 | Diploid |
| LCNEC-27 | CDKN2A | G45S | Missense | 0.49 | Diploid |
| LCNEC-27 | ERCC5 | K1171N | Missense | 0.22 | Diploid |
| LCNEC-27 | IKZF1 | S105L | Missense | 0.32 | Diploid |
| LCNEC-27 | PIK3C2G | F1016L | Missense | 0.24 | Diploid |
| LCNEC-27 | RB1 | N316fs | Frameshift | 0.11 | Diploid |
| LCNEC-27 | TP53 | R249W | Missense | 0.28 | Diploid |
| LCNEC-27 | TSC1 | E931* | Nonsense | 0.33 | Diploid |
| LCNEC-28 | AMER1 | D523Y | Missense | 0.53 | NA |
| LCNEC-28 | FAT1 | D2220Y | Missense | 0.22 | Diploid |
| LCNEC-28 | PAK7 | Y252N | Missense | 0.32 | Diploid |
| LCNEC-28 | PALB2 | Q139L | Missense | 0.36 | Diploid |
| LCNEC-28 | PDGFRA | H920Y | Missense | 0.39 | Diploid |
| LCNEC-28 | PTPN11 | G503V | Missense | 0.43 | Diploid |
| LCNEC-28 | STK11 | C278fs | Frameshift | 0.58 | Diploid |
| LCNEC-28 | TP53 | C238S | Missense | 0.52 | Diploid |
| LCNEC-28 | TP53 | V157F | Missense | 0.22 | Diploid |
| LCNEC-28 | WT1 | L79V | Missense | 0.11 | Diploid |
| LCNEC-29 | ARID1A | Q1342fs | Frameshift | 0.24 | Diploid |
| LCNEC-29 | ATRX | D163Y | Missense | 0.31 | NA |
| LCNEC-29 | DNMT3A | D811Y | Missense | 0.14 | Diploid |
| LCNEC-29 | INSR | R358L | Missense | 0.18 | Diploid |
| LCNEC-29 | KMT2C | A779G | Missense | 0.06 | Diploid |
| LCNEC-29 | MDM2 | R189H | Missense | 0.24 | Diploid |
| LCNEC-29 | NOTCH1 | P1442fs | Frameshift | 0.29 | Diploid |
| LCNEC-29 | NOTCH3 | V1581fs | Frameshift | 0.4 | Diploid |
| LCNEC-29 | NTRK3 | P415fs | Frameshift | 0.14 | Diploid |
| LCNEC-29 | POLE | Q1252* | Nonsense | 0.32 | Diploid |
| LCNEC-29 | RICTOR | G326R | Missense | 0.06 | Diploid |
| LCNEC-29 | ROS1 | S32I | Missense | 0.06 | Diploid |
| LCNEC-29 | TP53 | E204* | Nonsense | 0.35 | Diploid |
| LCNEC-29 | TSC2 | M1I | Missense | 0.36 | Diploid |
| [LCNEC-30](https://cbioportal.mskcc.org/case.do?sample_id=NR-lnet-030-P&cancer_study_id=lcnec_mskcc_rekhtman_2014) | TP53 | S166* | Nonsense | 0.87 | Diploid |
| [LCNEC-30](https://cbioportal.mskcc.org/case.do?sample_id=NR-lnet-030-P&cancer_study_id=lcnec_mskcc_rekhtman_2014) | NOTCH1 | Q1019* | Nonsense | 0.76 | Diploid |
| [LCNEC-30](https://cbioportal.mskcc.org/case.do?sample_id=NR-lnet-030-P&cancer_study_id=lcnec_mskcc_rekhtman_2014) | RB1 | T5fs | Frameshift | 0.4 | Diploid |
| LCNEC-31 | BAP1 | R146_splice | Splice Site | 0.1 | Diploid |
| LCNEC-31 | BAP1 | R417_splice | Splice Site | 0.05 | Diploid |
| LCNEC-31 | ERBB4 | A877S | Missense | 0.16 | Diploid |
| LCNEC-31 | ERCC2 | S630R | Missense | 0.26 | Diploid |
| LCNEC-31 | FLT4 | S48F | Missense | 0.11 | Diploid |
| LCNEC-31 | INSR | G32A | Missense | 0.42 | Diploid |
| LCNEC-31 | KMT2A | H1955R | Missense | 0.2 | Diploid |
| LCNEC-31 | KMT2A | K1962E | Missense | 0.17 | Diploid |
| LCNEC-31 | MAP2K1 | G128C | Missense | 0.28 | Diploid |
| LCNEC-31 | NOTCH4 | P183fs | Frameshift | 0.16 | Diploid |
| LCNEC-31 | NRAS | Q150H | Missense | 0.3 | Diploid |
| LCNEC-31 | PARK2 | A82S | Missense | 0.16 | Diploid |
| LCNEC-31 | PARP1 | D770G | Missense | 0.52 | Diploid |
| LCNEC-31 | PTPRT | L552H | Missense | 0.09 | Diploid |
| LCNEC-31 | STK11 | Q302* | Nonsense | 0.36 | Diploid |
| LCNEC-31 | TERT | A423D | Missense | 0.38 | Diploid |
| LCNEC-31 | TP53 | M237L | Missense | 0.2 | Diploid |
| LCNEC-31 | TP53 | R280T | Missense | 0.34 | Diploid |
| LCNEC-31 | XPO1 | V826G | Missense | 0.12 | Diploid |
| LCNEC-32 | BRCA1 | C27_splice | Splice Site | 0.27 | Diploid |
| LCNEC-32 | EPHA5 | G189V | Missense | 0.27 | Diploid |
| LCNEC-32 | GATA3 | S404R | Missense | 0.14 | Diploid |
| LCNEC-32 | GNAS | G432V | Missense | 0.41 | Diploid |
| LCNEC-32 | KMT2C | GPK3965del | Deletion | 0.15 | Diploid |
| LCNEC-32 | KRAS | G12C | Missense | 0.36 | Diploid |
| LCNEC-32 | MDM4 | V52_splice | Splice Site | 0.13 | Diploid |
| LCNEC-32 | PAX5 | S168F | Missense | 0.27 | Diploid |
| LCNEC-32 | PIK3C2G | K400Q | Missense | 0.04 | Diploid |
| LCNEC-32 | PIK3CD | M793I | Missense | 0.26 | Diploid |
| LCNEC-32 | PIK3R2 | V132L | Missense | 0.11 | Diploid |
| LCNEC-32 | PTCH1 | S523I | Missense | 0.29 | Diploid |
| LCNEC-32 | PTPRT | A802S | Missense | 0.37 | Diploid |
| LCNEC-32 | SMO | R161L | Missense | 0.21 | Diploid |
| LCNEC-32 | STK11 | V320fs | Frameshift | 0.31 | Diploid |
| LCNEC-32 | TP53 | E68* | Nonsense | 0.23 | Diploid |
| LCNEC-32 | TP53 | R249M | Missense | 0.2 | Diploid |
| LCNEC-32 | TP63 | S586C | Missense | 0.27 | Diploid |
| LCNEC-33 | ARID2 | S1327* | Nonsense | 0.44 | Diploid |
| LCNEC-33 | ARID2 | E75* | Nonsense | 0.36 | Diploid |
| LCNEC-33 | BAP1 | C91W | Missense | 0.29 | Diploid |
| LCNEC-33 | HRAS | N26S | Missense | 0.18 | Diploid |
| LCNEC-33 | KDM5C | I444F | Missense | 0.68 | NA |
| LCNEC-33 | KMT2D | V1674L | Missense | 0.45 | NA |
| LCNEC-33 | NTRK2 | Q596* | Nonsense | 0.59 | Diploid |
| LCNEC-33 | STK11 | A241P | Missense | 0.82 | Diploid |
| LCNEC-33 | TSC2 | G1204_splice | Splice Site | 0.09 | Diploid |
| LCNEC-34 | APC | A928fs | Frameshift | 0.3 | Diploid |
| LCNEC-34 | BRCA2 | K1649I | Missense | 0.38 | Diploid |
| LCNEC-34 | EPHA5 | S347Y | Missense | 0.41 | Diploid |
| LCNEC-34 | GATA3 | S175* | Nonsense | 0.47 | Diploid |
| LCNEC-34 | IKZF1 | R360P | Missense | 0.41 | Diploid |
| LCNEC-34 | KEAP1 | V369L | Missense | 0.49 | Diploid |
| LCNEC-34 | KMT2C | T4667I | Missense | 0.2 | Diploid |
| LCNEC-34 | NOTCH1 | Y1716C | Missense | 0.36 | Diploid |
| LCNEC-34 | NOTCH4 | L1101M | Missense | 0.29 | Diploid |
| LCNEC-34 | NTRK3 | N259K | Missense | 0.18 | Diploid |
| LCNEC-34 | STK11 | R297S | Missense | 0.5 | Diploid |
| LCNEC-34 | TP53 | K139* | Nonsense | 0.47 | Diploid |
| LCNEC-35 | AR | L295P | Missense | 0.97 | NA |
| LCNEC-35 | BRCA2 | S2307L | Missense | 0.18 | Diploid |
| LCNEC-35 | CD79B | G72R | Missense | 0.13 | Diploid |
| LCNEC-35 | CHEK2 | S49F | Missense | 0.12 | Diploid |
| LCNEC-35 | DICER1 | T870I | Missense | 0.13 | Diploid |
| LCNEC-35 | EPHA5 | G787* | Nonsense | 0.1 | Diploid |
| LCNEC-35 | FLT1 | G1096R | Missense | 0.22 | Diploid |
| LCNEC-35 | INSR | G1194R | Missense | 0.17 | Diploid |
| LCNEC-35 | KEAP1 | K108N | Missense | 0.24 | Diploid |
| LCNEC-35 | PARK2 | Q311_splice | Splice Site | 0.11 | Diploid |
| LCNEC-35 | PIK3C2G | V201L | Missense | 0.24 | Diploid |
| LCNEC-35 | TET2 | P874L | Missense | 0.35 | Diploid |
| LCNEC-35 | TP53 | V272L | Missense | 0.15 | Diploid |
| LCNEC-35 | TSC1 | E766* | Nonsense | 0.13 | Diploid |
| LCNEC-35 | TSHR | D5G | Missense | 0.14 | Diploid |
| [LCNEC-36](https://cbioportal.mskcc.org/case.do?sample_id=NR-lnet-036-P&cancer_study_id=lcnec_mskcc_rekhtman_2014) | GNAS | Y216C | Missense | 0.41 | Diploid |
| [LCNEC-36](https://cbioportal.mskcc.org/case.do?sample_id=NR-lnet-036-P&cancer_study_id=lcnec_mskcc_rekhtman_2014) | MEN1 | I575fs | Frameshift | 0.79 | Diploid |
| LCNEC-37 | BRCA2 | Y2789H | Missense | 0.78 | Diploid |
| LCNEC-37 | EGFR | L90F | Missense | 0.38 | Diploid |
| LCNEC-37 | EPHB1 | N67K | Missense | 0.33 | Diploid |
| LCNEC-37 | ERCC5 | E491K | Missense | 0.79 | Diploid |
| LCNEC-37 | ETV1 | G321L | Missense | 0.46 | Diploid |
| LCNEC-37 | NFE2L2 | F37S | Missense | 0.64 | Diploid |
| LCNEC-37 | RB1 | S463_splice | Splice Site | 0.68 | Diploid |
| LCNEC-37 | TP53 | Y126_splice | Splice Site | 0.85 | Diploid |
| LCNEC-38 | AMER1 | G98F | Missense | 0.34 | NA |
| LCNEC-38 | ARID1A | Q1519H | Missense | 0.32 | Diploid |
| LCNEC-38 | ATM | A1812P | Missense | 0.52 | Diploid |
| LCNEC-38 | ATM | T2902fs | Frameshift | 0.18 | Diploid |
| LCNEC-38 | ESR1 | R151_splice | Splice Site | 0.59 | Diploid |
| LCNEC-38 | KEAP1 | G511_splice | Splice Site | 0.63 | Diploid |
| LCNEC-38 | KMT2A | D2992N | Missense | 0.58 | Diploid |
| LCNEC-38 | KRAS | G12C | Missense | 0.26 | Diploid |
| LCNEC-38 | MEF2B | G158V | Missense | 0.61 | Diploid |
| LCNEC-38 | RICTOR | D1050Y | Missense | 0.19 | Diploid |
| LCNEC-38 | RUNX1 | L44M | Missense | 0.08 | Diploid |
| LCNEC-39 | ATM | L1939V | Missense | 0.21 | Diploid |
| LCNEC-39 | ATM | A1950T | Missense | 0.21 | Diploid |
| LCNEC-39 | ATM | K1410* | Nonsense | 0.48 | Diploid |
| LCNEC-39 | ATRX | A507D | Missense | 0.22 | NA |
| LCNEC-39 | ATRX | T1928K | Missense | 0.24 | NA |
| LCNEC-39 | DNMT3B | G434V | Missense | 0.43 | Diploid |
| LCNEC-39 | KRAS | Q61L | Missense | 0.4 | Diploid |
| LCNEC-39 | PAK7 | N314I | Missense | 0.35 | Diploid |
| LCNEC-39 | PIK3CG | P534H | Missense | 0.52 | Diploid |
| LCNEC-39 | POLE | D2128Y | Missense | 0.34 | Diploid |
| LCNEC-39 | RB1 | V434fs | Frameshift | 0.64 | Diploid |
| LCNEC-39 | SF3B1 | G140R | Missense | 0.26 | Diploid |
| LCNEC-39 | STAG2 | L203I | Missense | 0.22 | NA |
| LCNEC-40 | ASXL1 | M1161I | Missense | 0.44 | Diploid |
| LCNEC-40 | CARD11 | E213* | Nonsense | 0.33 | Diploid |
| LCNEC-40 | EPHA3 | K444* | Nonsense | 0.27 | Diploid |
| LCNEC-40 | HNF1A | T152S | Missense | 0.32 | Diploid |
| LCNEC-40 | NTRK3 | H658Q | Missense | 0.37 | Diploid |
| LCNEC-40 | SETD2 | 1889_1890MD>IY | Missense | 0.2 | Diploid |
| LCNEC-40 | STK11 | H107L | Missense | 0.47 | Diploid |
| LCNEC-40 | TP53 | M246V | Missense | 0.7 | Diploid |
| LCNEC-40 | WT1 | S496* | Nonsense | 0.17 | Diploid |
| LCNEC-669 | ARID1A | Q479* | Nonsense | 0.34 | Diploid |
| LCNEC-669 | BRAF | Q257H | Missense | 0.29 | Diploid |
| LCNEC-669 | CDC73 | L253I | Missense | 0.29 | Diploid |
| LCNEC-669 | FLT3 | E236* | Nonsense | 0.4 | Diploid |
| LCNEC-669 | FLT3 | A450E | Missense | 0.23 | Diploid |
| LCNEC-669 | KEAP1 | W591L | Missense | 0.75 | Diploid |
| LCNEC-669 | KMT2D | R3099L | Missense | 0.45 | NA |
| LCNEC-669 | MSH2 | R99I | Missense | 0.24 | Diploid |
| LCNEC-669 | NOTCH4 | G1278S | Missense | 0.54 | Diploid |
| LCNEC-669 | NTRK3 | I83_splice | Splice Site | 0.7 | Diploid |
| LCNEC-669 | PARP1 | D307N | Missense | 0.39 | Diploid |
| LCNEC-669 | PIK3C2G | E671* | Nonsense | 0.53 | Diploid |
| LCNEC-669 | PTPRD | A1113fs | Frameshift | 0.43 | Diploid |
| LCNEC-669 | RB1 | G581* | Nonsense | 0.67 | Diploid |
| LCNEC-669 | RNF43 | 661_662SE>F* | Nonsense | 0.2 | Diploid |
| LCNEC-669 | SDHB | D181_splice | Splice Site | 0.42 | Diploid |
| LCNEC-669 | SETD2 | H2514L | Missense | 0.57 | Diploid |
| LCNEC-669 | TMPRSS2 | G439_splice | Splice Site | 0.46 | Diploid |
| LCNEC-669 | TP53 | G279* | Nonsense | 0.66 | Diploid |
| LCNEC-637 | ARID1A | V1561fs | Frameshift | 0.5 | Diploid |
| LCNEC-637 | EPHA5 | C603R | Missense | 0.54 | Diploid |
| LCNEC-637 | ERBB4 | W823C | Missense | 0.27 | Diploid |
| LCNEC-637 | ERBB4 | P224L | Missense | 0.28 | Diploid |
| LCNEC-637 | ERCC5 | S947F | Missense | 0.8 | Diploid |
| LCNEC-637 | KEAP1 | G332S | Missense | 0.8 | Diploid |
| LCNEC-637 | NOTCH1 | Q1076H | Missense | 0.28 | Diploid |
| LCNEC-637 | PAX5 | T386N | Missense | 0.79 | Diploid |
| LCNEC-637 | PTPRD | Y803* | Nonsense | 0.75 | Diploid |
| LCNEC-637 | PTPRT | A413S | Missense | 0.41 | Diploid |
| LCNEC-637 | RB1 | L523fs | Frameshift | 0.77 | Diploid |
| LCNEC-637 | SF3B1 | G83* | Nonsense | 0.28 | Diploid |
| LCNEC-637 | SMO | A250D | Missense | 0.46 | Diploid |
| LCNEC-637 | TET1 | P490T | Missense | 0.38 | Diploid |
| LCNEC-637 | TP53 | R249S | Missense | 0.84 | Diploid |
| LCNEC-897 | ARID1B | M1361I | Missense | 0.39 | Diploid |
| LCNEC-897 | ATRX | H2260N | Missense | 0.27 | Diploid |
| LCNEC-897 | CDC73 | E144D | Missense | 0.4 | Diploid |
| LCNEC-897 | DDR2 | S50N | Missense | 0.35 | Diploid |
| LCNEC-897 | EPHA5 | P653Q | Missense | 0.34 | Diploid |
| LCNEC-897 | ERBB4 | S479I | Missense | 0.37 | Diploid |
| LCNEC-897 | IDH2 | A101P | Missense | 0.41 | Diploid |
| LCNEC-897 | KEAP1 | G603V | Missense | 0.59 | Diploid |
| LCNEC-897 | KIT | G387R | Missense | 0.44 | Diploid |
| LCNEC-897 | KRAS | G12C | Missense | 0.38 | Diploid |
| LCNEC-897 | PIK3CD | R636W | Missense | 0.37 | Diploid |
| LCNEC-897 | RAD50 | R196L | Missense | 0.72 | Diploid |
| LCNEC-897 | STK11 | Q214* | Nonsense | 0.63 | Diploid |
| LCNEC-897 | TP53 | E224_splice | Splice Site | 0.61 | Diploid |
| LCNEC-462 | ATM | R1249_splice | Splice Site | 0.39 | Diploid |
| LCNEC-462 | CDK6 | G165V | Missense | 0.33 | Diploid |
| LCNEC-462 | FAT1 | D4244A | Missense | 0.17 | Diploid |
| LCNEC-462 | POLE | E1377* | Nonsense | 0.23 | Diploid |
| LCNEC-462 | PTEN | N292fs | Frameshift | 0.64 | Diploid |
| LCNEC-462 | SMARCB1 | D169H | Missense | 0.59 | Diploid |
| LCNEC-462 | TP53 | S215I | Missense | 0.68 | Diploid |
| LCNEC-299 | FLT1 | M996T | Missense | 0.08 | Diploid |
| LCNEC-299 | KRAS | G12C | Missense | 0.17 | Diploid |
| LCNEC-299 | NF1 | I1824V | Missense | 0.13 | Diploid |
| LCNEC-299 | SDHB | D64A | Missense | 0.16 | Diploid |
| LCNEC-299 | STK11 | H174D | Missense | 0.18 | Diploid |
| LCNEC-913 | MEN1 | S313* | Nonsense | 0.89 | Diploid |
| LCNEC-41 | AKT3 | P50T | Missense | 0.41 | Diploid |
| LCNEC-41 | AKT3 | S210F | Missense | 0.21 | Diploid |
| LCNEC-41 | CDKN2A | Y129* | Nonsense | 0.43 | NA |
| LCNEC-41 | CIC | E1237K | Missense | 0.37 | Diploid |
| LCNEC-41 | EPHA3 | G783V | Missense | 0.22 | Diploid |
| LCNEC-41 | EPHB1 | F699Y | Missense | 0.4 | Diploid |
| LCNEC-41 | EPHB1 | E475G | Missense | 0.15 | Diploid |
| LCNEC-41 | GRIN2A | L1277F | Missense | 0.35 | Diploid |
| LCNEC-41 | IGF1R | X1100_splice | Splice Site | 0.33 | Diploid |
| LCNEC-41 | KEAP1 | G509V | Missense | 0.46 | Diploid |
| LCNEC-41 | NF1 | D2545H | Missense | 0.52 | Diploid |
| LCNEC-41 | NF1 | X1612_splice | Splice Site | 0.42 | Diploid |
| LCNEC-41 | PDGFRA | G51E | Missense | 0.22 | Diploid |
| LCNEC-41 | PTPRT | S419R | Missense | 0.07 | Diploid |
| LCNEC-41 | SMARCA4 | S1079A | Missense | 0.42 | Diploid |
| LCNEC-41 | SMARCA4 | S1079L | Missense | 0.41 | Diploid |
| LCNEC-41 | TP53 | R248W | Missense | 0.47 | Diploid |
| LCNEC-42 | CCND2 | K148Q | Missense | 0.14 | Diploid |
| LCNEC-42 | DIS3 | L473P | Missense | 0.34 | Diploid |
| LCNEC-42 | FGFR2 | G583V | Missense | 0.22 | Diploid |
| LCNEC-42 | FLT4 | Y853* | Nonsense | 0.1 | Diploid |
| LCNEC-42 | INPP4A | G688A | Missense | 0.35 | Diploid |
| LCNEC-42 | IRS1 | R360Q | Missense | 0.21 | Diploid |
| LCNEC-42 | KDM6A | Q435H | Missense | 0.21 | Diploid |
| LCNEC-42 | KEAP1 | E611* | Nonsense | 0.17 | Diploid |
| LCNEC-42 | NOTCH3 | D711N | Missense | 0.21 | Diploid |
| LCNEC-42 | PIK3CA | I910M | Missense | 0.13 | Diploid |
| LCNEC-42 | PIK3CG | T81N | Missense | 0.22 | Diploid |
| LCNEC-42 | PTPRD | S384T | Missense | 0.12 | Diploid |
| LCNEC-42 | PTPRT | L1373I | Missense | 0.17 | Diploid |
| LCNEC-42 | ROS1 | S1577Y | Missense | 0.15 | Diploid |
| LCNEC-42 | ROS1 | X587_splice | Splice Site | 0.13 | Diploid |
| LCNEC-42 | STK11 | X97_splice | Splice Site | 0.46 | Diploid |
| LCNEC-42 | TET1 | G390V | Missense | 0.19 | Diploid |
| LCNEC-42 | TP53 | R248L | Missense | 0.16 | Diploid |
| LCNEC-42 | TP53 | E171* | Nonsense | 0.25 | Diploid |
| LCNEC-43 | CDK12 | K852Q | Missense | 0.24 | Diploid |
| LCNEC-43 | EPHA3 | K735N | Missense | 0.2 | Diploid |
| LCNEC-43 | GATA1 | Y98* | Nonsense | 0.78 | Diploid |
| LCNEC-43 | KIT | A402S | Missense | 0.53 | Diploid |
| LCNEC-43 | KRAS | G13D | Missense | 0.64 | Diploid |
| LCNEC-43 | PAK7 | Q692* | Nonsense | 0.41 | Diploid |
| LCNEC-43 | PTPRD | Q475K | Missense | 0.36 | Diploid |
| LCNEC-43 | SOX2 | Y227F | Missense | 0.47 | Diploid |
| LCNEC-43 | STK11 | L245F | Missense | 0.65 | Diploid |
| LCNEC-43 | TP53 | R158L | Missense | 0.3 | Diploid |
| LCNEC-43 | TP53 | C277F | Missense | 0.32 | Diploid |
| LCNEC-43 | TP53 | M243I | Missense | 0.25 | Diploid |
| LCNEC-43 | TSC2 | G1551R | Missense | 0.4 | Diploid |
| LCNEC-43 | WT1 | P232T | Missense | 0.38 | Diploid |
| LCNEC-44 | AMER1 | Q1042R | Missense | 0.42 | Diploid |
| LCNEC-44 | ARID1A | Q492H | Missense | 0.26 | Diploid |
| LCNEC-44 | BRCA1 | E515G | Missense | 0.13 | Diploid |
| LCNEC-44 | CBL | V478L | Missense | 0.28 | Diploid |
| LCNEC-44 | CBL | X478_splice | Splice Site | 0.27 | Diploid |
| LCNEC-44 | EPHA3 | E471D | Missense | 0.25 | Diploid |
| LCNEC-44 | FAT1 | P1351A | Missense | 0.06 | Diploid |
| LCNEC-44 | FAT1 | A3913P | Missense | 0.39 | Diploid |
| LCNEC-44 | FAT1 | A3091D | Missense | 0.28 | Diploid |
| LCNEC-44 | FH | P26A | Missense | 0.17 | Diploid |
| LCNEC-44 | FLT3 | A914D | Missense | 0.08 | Diploid |
| LCNEC-44 | FLT3 | R933L | Missense | 0.1 | Diploid |
| LCNEC-44 | IRF4 | E389Q | Missense | 0.31 | Diploid |
| LCNEC-44 | KEAP1 | C171S | Missense | 0.49 | Diploid |
| LCNEC-44 | KMT2A | S3204F | Missense | 0.07 | Diploid |
| LCNEC-44 | KMT2A | Q3047H | Missense | 0.15 | Diploid |
| LCNEC-44 | MED12 | A1775D | Missense | 0.18 | Diploid |
| LCNEC-44 | MRE11A | S119* | Nonsense | 0.17 | Diploid |
| LCNEC-44 | NF1 | H1576P | Missense | 0.33 | Diploid |
| LCNEC-44 | NOTCH1 | G1258C | Missense | 0.65 | Diploid |
| LCNEC-44 | NOTCH4 | C205* | Nonsense | 0.18 | Diploid |
| LCNEC-44 | NTRK3 | X410_splice | Splice Site | 0.36 | Diploid |
| LCNEC-44 | PDGFRB | G920R | Missense | 0.35 | Diploid |
| LCNEC-44 | RB1 | R320L | Missense | 0.29 | Diploid |
| LCNEC-44 | RB1 | K319Nfs*13 | Frameshift | 0.27 | Diploid |
| LCNEC-44 | STAG2 | Y775* | Nonsense | 0.27 | Diploid |
| LCNEC-44 | TGFBR2 | V188A | Missense | 0.29 | Diploid |
| LCNEC-44 | TP53 | V73Rfs*76 | Frameshift | 0.38 | Diploid |
| LCNEC-45 | ATM | Q2066L | Missense | 0.22 | Diploid |
| LCNEC-45 | BCOR | K219E | Missense | 0.15 | Diploid |
| LCNEC-45 | CCND2 | W149* | Nonsense | 0.06 | Diploid |
| LCNEC-45 | DIS3 | S4C | Missense | 0.16 | Diploid |
| LCNEC-45 | DNMT3A | A121S | Missense | 0.29 | Diploid |
| LCNEC-45 | KMT2D | T4028Rfs*11 | Frameshift | 0.12 | NA |
| LCNEC-45 | KMT2D | P941T | Missense | 0.34 | NA |
| LCNEC-45 | MYCN | R383P | Missense | 0.3 | Diploid |
| LCNEC-45 | NF1 | X1444_splice | Splice Site | 0.45 | Diploid |
| LCNEC-45 | SMARCA4 | Q941H | Missense | 0.6 | Diploid |
| LCNEC-45 | SMARCA4 | Q756Vfs*67 | Frameshift | 0.53 | Diploid |
| LCNEC-45 | TP53 | Y163C | Missense | 0.54 | Diploid |
| LCNEC-46 | BAP1 | X13_splice | Splice Site | 0.3 | Diploid |
| LCNEC-46 | PARK2 | E370Q | Missense | 0.19 | Diploid |
| LCNEC-46 | PARP1 | D243Y | Missense | 0.11 | Diploid |
| LCNEC-46 | PDGFRA | T152A | Missense | 0.21 | Diploid |
| LCNEC-46 | PDGFRA | E951* | Nonsense | 0.18 | Diploid |
| LCNEC-46 | PTEN | R173C | Missense | 0.06 | Diploid |
| LCNEC-46 | PTPRD | P695R | Missense | 0.22 | Diploid |
| LCNEC-46 | PTPRD | S1554C | Missense | 0.26 | Diploid |
| LCNEC-46 | PTPRT | Y961N | Missense | 0.25 | Diploid |
| LCNEC-46 | RARA | Y100C | Missense | 0.22 | Diploid |
| LCNEC-46 | RB1 | Q444L | Missense | 0.34 | Diploid |
| LCNEC-46 | ROS1 | M1805V | Missense | 0.07 | Diploid |
| LCNEC-46 | SMARCA4 | G1585C | Missense | 0.17 | Diploid |
| LCNEC-46 | STAG2 | X676_splice | Splice Site | 0.43 | Diploid |
| LCNEC-46 | TGFBR2 | W529C | Missense | 0.29 | Diploid |
| LCNEC-46 | TP53 | X261_splice | Splice Site | 0.28 | Diploid |
| LCNEC-46 | TSC2 | D416N | Missense | 0.29 | Diploid |
| LCNEC-47 | ATRX | D2326Y | Missense | 0.33 | Diploid |
| LCNEC-47 | FLT3 | X402_splice | Splice Site | 0.61 | Diploid |
| LCNEC-47 | IL7R | L340I | Missense | 0.32 | Diploid |
| LCNEC-47 | IL7R | L340H | Missense | 0.33 | Diploid |
| LCNEC-47 | JUN | G237V | Missense | 0.37 | Diploid |
| LCNEC-47 | MRE11A | R707G | Missense | 0.48 | Diploid |
| LCNEC-47 | NF1 | M1981I | Missense | 0.65 | Diploid |
| LCNEC-47 | NOTCH3 | G878V | Missense | 0.82 | Diploid |
| LCNEC-47 | PBRM1 | K1247I | Missense | 0.37 | Diploid |
| LCNEC-47 | RB1 | X127_splice | Splice Site | 0.77 | Diploid |
| LCNEC-47 | SMARCA4 | K1237* | Nonsense | 0.8 | Diploid |
| LCNEC-47 | TP53 | Y205* | Nonsense | 0.82 | Diploid |
| LCNEC-48 | BCOR | D1279Y | Missense | 0.28 | Diploid |
| LCNEC-48 | ESR1 | Y459N | Missense | 0.57 | Diploid |
| LCNEC-48 | FAT1 | Q3679* | Nonsense | 0.58 | Diploid |
| LCNEC-48 | FGFR1 | R285L | Missense | 0.39 | Diploid |
| LCNEC-48 | INPP4A | K123N | Missense | 0.37 | Diploid |
| LCNEC-48 | IRS2 | G1308V | Missense | 0.64 | Diploid |
| LCNEC-48 | JAK3 | P975L | Missense | 0.61 | Diploid |
| LCNEC-48 | KMT2A | E2898D | Missense | 0.19 | Diploid |
| LCNEC-48 | MED12 | G2041A | Missense | 0.35 | Diploid |
| LCNEC-48 | MED12 | K1673N | Missense | 0.31 | Diploid |
| LCNEC-48 | MTOR | I94M | Missense | 0.35 | Diploid |
| LCNEC-48 | RB1 | W681* | Nonsense | 0.59 | Diploid |
| LCNEC-48 | STAG2 | W315C | Missense | 0.31 | Diploid |
| LCNEC-48 | TP53 | R283P | Missense | 0.71 | Diploid |
| LCNEC-49 | AR | G473dup | Insertion | 0.08 | Diploid |
| LCNEC-49 | ETV6 | I406S | Missense | 0.33 | Diploid |
| LCNEC-49 | KRAS | G12C | Missense | 0.27 | Diploid |
| LCNEC-49 | STK11 | H168R | Missense | 0.28 | Diploid |
| LCNEC-49 | TET1 | R3L | Missense | 0.18 | Diploid |
| LCNEC-49 | TET2 | R1202I | Missense | 0.17 | Diploid |
| LCNEC-50 | CREBBP | G292V | Missense | 0.15 | Diploid |
| LCNEC-50 | ETV1 | G274C | Missense | 0.09 | Diploid |
| LCNEC-50 | FLT1 | S68N | Missense | 0.1 | Diploid |
| LCNEC-50 | IL7R | G103* | Nonsense | 0.07 | Diploid |
| LCNEC-50 | MAP3K1 | S923I | Missense | 0.1 | Diploid |
| LCNEC-50 | MED12 | C1078G | Missense | 0.13 | Diploid |
| LCNEC-50 | NBN | Q286H | Missense | 0.2 | Diploid |
| LCNEC-50 | STK11 | E138* | Nonsense | 0.21 | Diploid |
| LCNEC-51 | DICER1 | R1851H | Missense | 0.11 | Diploid |
| LCNEC-51 | FUBP1 | V217L | Missense | 0.52 | Diploid |
| LCNEC-51 | NOTCH1 | R1784W | Missense | 0.05 | DeepDel |
| LCNEC-51 | NOTCH2 | D1874Y | Missense | 0.29 | Diploid |
| LCNEC-51 | NOTCH3 | G2076V | Missense | 0.24 | Diploid |
| LCNEC-51 | TP53 | V157F | Missense | 0.63 | Diploid |
| LCNEC-52 | CREBBP | P814A | Missense | 0.16 | Diploid |
| LCNEC-52 | FBXW7 | D550Mfs*6 | Frameshift | 0.65 | Diploid |
| LCNEC-52 | KMT2C | N1575K | Missense | 0.49 | Diploid |
| LCNEC-52 | KMT2D | E225* | Nonsense | 0.29 | NA |
| LCNEC-52 | KRAS | G13D | Missense | 0.64 | Diploid |
| LCNEC-52 | ROS1 | F923I | Missense | 0.3 | Diploid |
| LCNEC-52 | SMARCA4 | X531_splice | Splice Site | 0.71 | Diploid |
| LCNEC-52 | TP53 | H179L | Missense | 0.69 | Diploid |
| LCNEC-53 | APC | C207* | Nonsense | 0.34 | Diploid |
| LCNEC-53 | EGFR | X210_splice | Splice Site | 0.33 | Diploid |
| LCNEC-53 | GATA3 | D98E | Missense | 0.21 | Diploid |
| LCNEC-53 | MET | E25D | Missense | 0.06 | Diploid |
| LCNEC-53 | PIK3CD | A688T | Missense | 0.24 | Diploid |
| LCNEC-53 | RB1 | X350_splice | Splice Site | 0.31 | Diploid |
| LCNEC-53 | TP53 | H179R | Missense | 0.42 | Diploid |
| LCNEC-55 | EZH2 | P577L | Missense | 0.4 | Diploid |
| LCNEC-55 | KMT2D | Q4235* | Nonsense | 0.34 | NA |
| LCNEC-55 | SF3B1 | I1004L | Missense | 0.39 | Diploid |
| LCNEC-55 | TP53 | Y220H | Missense | 0.66 | Diploid |
| LCNEC-56 | ARID1A | Y551Tfs*68 | Frameshift | 0.23 | Diploid |
| LCNEC-56 | BRCA2 | V348L | Missense | 0.51 | Diploid |
| LCNEC-56 | CDK8 | G56Efs*12 | Frameshift | 0.51 | Diploid |
| LCNEC-56 | CIC | D93V | Missense | 0.27 | Diploid |
| LCNEC-56 | E2F3 | R121L | Missense | 0.47 | Diploid |
| LCNEC-56 | FGFR1 | X4_splice | Splice Site | 0.32 | Diploid |
| LCNEC-56 | GRIN2A | S304A | Missense | 0.1 | Diploid |
| LCNEC-56 | GRIN2A | G354C | Missense | 0.26 | Diploid |
| LCNEC-56 | KEAP1 | G364S | Missense | 0.6 | Diploid |
| LCNEC-56 | MSH6 | A64V | Missense | 0.33 | Diploid |
| LCNEC-56 | NTRK3 | S672Y | Missense | 0.35 | Diploid |
| LCNEC-56 | SMARCA4 | G168V | Missense | 0.55 | Diploid |
| LCNEC-56 | TP53 | V157F | Missense | 0.63 | Diploid |
| LCNEC-56 | TSC1 | M736I | Missense | 0.51 | Diploid |
| LCNEC-56 | YAP1 | V212F | Missense | 0.47 | Diploid |
| LCNEC-57 | BCL6 | D63N | Missense | 0.34 | Diploid |
| LCNEC-57 | BRCA2 | G2063E | Missense | 0.22 | Diploid |
| LCNEC-57 | CSF1R | A273S | Missense | 0.37 | Diploid |
| LCNEC-57 | EPHA3 | M674I | Missense | 0.29 | Diploid |
| LCNEC-57 | EPHA5 | G1033R | Missense | 0.41 | Diploid |
| LCNEC-57 | ERBB4 | K812N | Missense | 0.14 | Diploid |
| LCNEC-57 | ETV1 | V388I | Missense | 0.22 | Diploid |
| LCNEC-57 | FLT1 | K300E | Missense | 0.21 | Diploid |
| LCNEC-57 | KDM5C | V58M | Missense | 0.51 | Diploid |
| LCNEC-57 | KRAS | G12C | Missense | 0.27 | Diploid |
| LCNEC-57 | MDM4 | Q68R | Missense | 0.14 | Diploid |
| LCNEC-57 | NF1 | Y2162F | Missense | 0.52 | Diploid |
| LCNEC-57 | NOTCH4 | L953I | Missense | 0.29 | Diploid |
| LCNEC-57 | PAK7 | C708* | Nonsense | 0.51 | Diploid |
| LCNEC-57 | PAX5 | E121Q | Missense | 0.71 | Diploid |
| LCNEC-57 | PDGFRA | V140L | Missense | 0.37 | Diploid |
| LCNEC-57 | PIK3R1 | S231G | Missense | 0.48 | Diploid |
| LCNEC-57 | SMAD4 | G80R | Missense | 0.27 | Diploid |
| LCNEC-57 | TNFAIP3 | E297K | Missense | 0.4 | Diploid |
| LCNEC-57 | TP53 | R158L | Missense | 0.3 | Diploid |
| LCNEC-57 | TP53 | V217L | Missense | 0.5 | Diploid |
| LCNEC-57 | TP53 | V218Gfs*4 | Frameshift | 0.47 | Diploid |
| LCNEC-58 | APC | E190* | Nonsense | 0.71 | Diploid |
| LCNEC-58 | EPHA3 | P325R | Missense | 0.53 | Diploid |
| LCNEC-58 | EPHA5 | W117C | Missense | 0.31 | Diploid |
| LCNEC-58 | ERBB4 | Q44E | Missense | 0.15 | Diploid |
| LCNEC-58 | GATA3 | G248A | Missense | 0.59 | DeepDel |
| LCNEC-58 | IKZF1 | S101I | Missense | 0.75 | Diploid |
| LCNEC-58 | IRS1 | G174C | Missense | 0.23 | Diploid |
| LCNEC-58 | IRS1 | G947V | Missense | 0.16 | Diploid |
| LCNEC-58 | IRS2 | G1304V | Missense | 0.27 | Diploid |
| LCNEC-58 | PAK7 | G84C | Missense | 0.79 | Diploid |
| LCNEC-58 | POLE | E2036* | Nonsense | 0.38 | Diploid |
| LCNEC-58 | PTPRT | L1432R | Missense | 0.43 | Diploid |
| LCNEC-58 | SMARCA4 | D602Mfs*11 | Frameshift | 0.51 | Diploid |
| LCNEC-58 | STK11 | I35Lfs*127 | Frameshift | 0.72 | Diploid |
| LCNEC-58 | STK11 | Y36D | Missense | 0.73 | Diploid |
| LCNEC-59 | GRIN2A | D1398Y | Missense | 0.24 | Diploid |
| LCNEC-59 | KRAS | G12D | Missense | 0.26 | Diploid |
| LCNEC-59 | PTEN | C218* | Nonsense | 0.34 | Diploid |
| LCNEC-59 | TP53 | R267W | Missense | 0.29 | Diploid |
| LCNEC-60 | ABL1 | K596* | Nonsense | 0.05 | Diploid |
| LCNEC-60 | BRCA2 | D438Y | Missense | 0.05 | Diploid |
| LCNEC-60 | CBL | W408L | Missense | 0.17 | Diploid |
| LCNEC-60 | CDK12 | V39L | Missense | 0.09 | Diploid |
| LCNEC-60 | CREBBP | X1204_splice | Splice Site | 0.15 | Diploid |
| LCNEC-60 | EGFR | D1014V | Missense | 0.23 | Diploid |
| LCNEC-60 | FLT3 | C184* | Nonsense | 0.18 | Diploid |
| LCNEC-60 | INPP4A | E857* | Nonsense | 0.21 | Diploid |
| LCNEC-60 | MAPK1 | A9S | Missense | 0.36 | Diploid |
| LCNEC-60 | MET | D824Y | Missense | 0.09 | Diploid |
| LCNEC-60 | NOTCH1 | C438S | Missense | 0.19 | Diploid |
| LCNEC-60 | PTCH1 | E1120Sfs*19 | Frameshift | 0.34 | Diploid |
| LCNEC-60 | RARA | G430V | Missense | 0.14 | Diploid |
| LCNEC-60 | ROS1 | V1979E | Missense | 0.24 | Diploid |
| LCNEC-60 | STK11 | W308* | Nonsense | 0.28 | Diploid |
| LCNEC-60 | TNFAIP3 | S548F | Missense | 0.29 | Diploid |
| LCNEC-60 | TP53 | X307_splice | Splice Site | 0.28 | Diploid |
| LCNEC-61 | ABL1 | V422I | Missense | 0.51 | Diploid |
| LCNEC-61 | AMER1 | R591S | Missense | 0.69 | Diploid |
| LCNEC-61 | AR | R511T | Missense | 0.35 | Diploid |
| LCNEC-61 | CCND2 | G213W | Missense | 0.15 | Diploid |
| LCNEC-61 | CCND3 | L137Ffs*10 | Frameshift | 0.27 | Diploid |
| LCNEC-61 | DNMT3A | E240* | Nonsense | 0.61 | Diploid |
| LCNEC-61 | EPHB1 | G41V | Missense | 0.23 | Diploid |
| LCNEC-61 | EPHB1 | G41W | Missense | 0.23 | Diploid |
| LCNEC-61 | ERBB4 | R525S | Missense | 0.38 | Diploid |
| LCNEC-61 | ERBB4 | V421L | Missense | 0.2 | Diploid |
| LCNEC-61 | FAT1 | G1307E | Missense | 0.18 | Diploid |
| LCNEC-61 | FAT1 | E3264Q | Missense | 0.41 | Diploid |
| LCNEC-61 | FH | X90_splice | Splice Site | 0.18 | Diploid |
| LCNEC-61 | GRIN2A | H1419N | Missense | 0.17 | Diploid |
| LCNEC-61 | GRIN2A | N1144K | Missense | 0.39 | Diploid |
| LCNEC-61 | IDH1 | V386L | Missense | 0.41 | Diploid |
| LCNEC-61 | IGF1R | E811* | Nonsense | 0.42 | Diploid |
| LCNEC-61 | KMT2C | D3152Y | Missense | 0.3 | Diploid |
| LCNEC-61 | MYCN | N305K | Missense | 0.23 | Diploid |
| LCNEC-61 | NOTCH4 | G1393V | Missense | 0.31 | Diploid |
| LCNEC-61 | NTRK3 | E86* | Nonsense | 0.2 | Diploid |
| LCNEC-61 | PAK7 | K149N | Missense | 0.29 | Diploid |
| LCNEC-61 | PALB2 | S417F | Missense | 0.4 | Diploid |
| LCNEC-61 | PIK3CB | G340R | Missense | 0.26 | Diploid |
| LCNEC-61 | PPP2R1A | R144L | Missense | 0.37 | Diploid |
| LCNEC-61 | PTPRT | P174H | Missense | 0.16 | Diploid |
| LCNEC-61 | RAF1 | V21L | Missense | 0.44 | Diploid |
| LCNEC-61 | RB1 | V375F | Missense | 0.09 | Diploid |
| LCNEC-61 | STAG2 | V233E | Missense | 0.45 | Diploid |
| LCNEC-61 | TP53 | E286A | Missense | 0.65 | Diploid |
| LCNEC-62 | ATRX | D1058Y | Missense | 0.07 | Diploid |
| LCNEC-62 | ATRX | E2226del | Deletion | 0.3 | Diploid |
| LCNEC-62 | KDM6A | Q635Yfs*55 | Frameshift | 0.27 | Diploid |
| LCNEC-62 | KEAP1 | E219A | Missense | 0.5 | Diploid |
| LCNEC-62 | KMT2D | N5497_P5498delinsT | Deletion | 0.21 | NA |
| LCNEC-62 | RB1 | E843* | Nonsense | 0.31 | Diploid |
| LCNEC-62 | RB1 | X464_splice | Splice Site | 0.11 | Diploid |
| LCNEC-62 | STAG2 | L182F | Missense | 0.1 | Diploid |
| LCNEC-62 | TP53 | A159P | Missense | 0.38 | Diploid |
| LCNEC-63 | ARID2 | D248* | Frameshift | 0.49 | Diploid |
| LCNEC-63 | FLT4 | R801S | Missense | 0.35 | Diploid |
| LCNEC-63 | NF1 | X420_splice | Splice Site | 0.58 | Diploid |
| LCNEC-63 | RB1 | Y529* | Nonsense | 0.33 | Diploid |
| LCNEC-63 | TP53 | X224_splice | Splice Site | 0.57 | Diploid |
| LCNEC-64 | ERBB2 | P1207A | Missense | 0.09 | Diploid |
| LCNEC-64 | ERBB2 | R545* | Nonsense | 0.09 | Diploid |
| LCNEC-64 | FGFR1 | K223I | Missense | 0.18 | Diploid |
| LCNEC-64 | IRS2 | S402L | Missense | 0.15 | Diploid |
| LCNEC-64 | KDR | R73M | Missense | 0.11 | Diploid |
| LCNEC-64 | KEAP1 | I519Nfs*8 | Frameshift | 0.19 | Diploid |
| LCNEC-64 | MSH2 | R852del | Deletion | 0.07 | Diploid |
| LCNEC-64 | PIK3CG | L428I | Missense | 0.11 | Diploid |
| LCNEC-64 | PTPRT | A1263D | Missense | 0.16 | Diploid |
| LCNEC-64 | RUNX1 | A307V | Missense | 0.35 | Diploid |
| LCNEC-64 | STK11 | E165* | Nonsense | 0.14 | Diploid |
| LCNEC-64 | TP53 | R249M | Missense | 0.2 | Diploid |

**Complete list of copy number alterations**

| **Sample ID** | **Gene** | **CNA** | **Fold change** |
| --- | --- | --- | --- |
| LCNEC-25 | JAK2 | AMP | 2.04 |
| LCNEC-25 | CDK4 | AMP | 3.36 |
| LCNEC-25 | CRKL | AMP | 2.29 |
| LCNEC-25 | FAM46C | AMP | 2.28 |
| LCNEC-27 | JAK2 | AMP | 6.57 |
| LCNEC-27 | PTPRD | AMP | 2.35 |
| LCNEC-28 | MSH2 | AMP | 6.54 |
| LCNEC-28 | MSH6 | AMP | 5.53 |
| LCNEC-28 | CCND1 | AMP | 4.48 |
| LCNEC-28 | MYCN | AMP | 8.45 |
| LCNEC-29 | TERT | AMP | 2.38 |
| LCNEC-30 | MYCN | DeepDel | -2.62 |
| LCNEC-31 | MYC | AMP | 3.60 |
| LCNEC-31 | NKX2-1 | AMP | 2.03 |
| LCNEC-32 | NKX2-1 | AMP | 4.14 |
| LCNEC-33 | CDKN2A | DeepDel | -4.02 |
| LCNEC-33 | CDKN2B | DeepDel | -3.88 |
| LCNEC-33 | IRS2 | AMP | 2.52 |
| LCNEC-37 | MYC | AMP | 6.26 |
| LCNEC-37 | SOX2 | AMP | 2.43 |
| LCNEC-37 | FGFR1 | AMP | 4.96 |
| LCNEC-38 | MYC | AMP | 3.07 |
| LCNEC-38 | NKX2-1 | AMP | 5.33 |
| LCNEC-38 | FLCN | AMP | 5.00 |
| LCNEC-38 | JUN | DeepDel | -2.53 |
| LCNEC-38 | MAP2K4 | AMP | 3.27 |
| LCNEC-39 | MYC | AMP | 3.01 |
| LCNEC-39 | MET | AMP | 2.81 |
| LCNEC-637 | PTEN | DeepDel | -2.20 |
| LCNEC-637 | CCNE1 | AMP | 5.30 |
| LCNEC-897 | NKX2-1 | AMP | 2.60 |
| LCNEC-462 | RB1 | Intragenic deletion |  |
| LCNEC-41 | CCNE1 | AMP | 2.13 |
| LCNEC-45 | SOX2 | AMP | 4.06 |
| LCNEC-45 | MYC | AMP | 2.71 |
| LCNEC-45 | RB1 | DeepDel | -2.74 |
| LCNEC-47 | PAX5 | DeepDel | -2.02 |
| LCNEC-47 | DNMT3B | AMP | 2.28 |
| LCNEC-48 | MYCL | AMP | 4.48 |
| LCNEC-48 | JUN | AMP | 2.50 |
| LCNEC-48 | FGFR4 | AMP | 2.29 |
| LCNEC-49 | NKX2-1 | AMP | 4.01 |
| LCNEC-50 | MYC | AMP | 2.41 |
| LCNEC-51 | FLT1 | AMP | 2.09 |
| LCNEC-51 | FLT3 | AMP | 3.84 |
| LCNEC-51 | IRS2 | AMP | 5.03 |
| LCNEC-51 | MPL | AMP | 2.81 |
| LCNEC-51 | MYCL | AMP | 11.63 |
| LCNEC-51 | NKX2-1 | AMP | 5.23 |
| LCNEC-51 | NOTCH1 | DeepDel | -2.02 |
| LCNEC-51 | SOX2 | AMP | 2.67 |
| LCNEC-51 | RB1 | Intragenic deletion |  |
| LCNEC-53 | KEAP1 | DeepDel | -2.45 |
| LCNEC-55 | NOTCH1 | DeepDel | -2.04 |
| LCNEC-55 | CDKN2C | AMP | 2.18 |
| LCNEC-56 | CCNE1 | AMP | 2.47 |
| LCNEC-56 | CDKN2B | DeepDel | -3.88 |
| LCNEC-56 | CDKN2AP16INK4A | DeepDel | -3.88 |
| LCNEC-57 | CCNE1 | AMP | 4.13 |
| LCNEC-57 | PIK3CB | AMP | 2.32 |
| LCNEC-57 | FOXL2 | AMP | 2.32 |
| LCNEC-57 | ATR | AMP | 2.32 |
| LCNEC-58 | CCND1 | AMP | 5.39 |
| LCNEC-58 | FGFR1 | AMP | 5.04 |
| LCNEC-58 | GATA3 | DeepDel | -2.31 |
| LCNEC-58 | NKX2-1 | AMP | 5.88 |
| LCNEC-58 | SOX2 | AMP | 3.34 |
| LCNEC-61 | CDKN2C | AMP | 2.20 |
| LCNEC-61 | JUN | AMP | 2.20 |
| LCNEC-61 | KDM5C | AMP | 2.34 |
| LCNEC-61 | MYCL | AMP | 3.81 |
| LCNEC-61 | NKX2-1 | AMP | 5.44 |
| LCNEC-61 | SOX2 | AMP | 2.93 |
| LCNEC-62 | MPL | AMP | 2.27 |
| LCNEC-62 | NKX2-1 | AMP | 3.38 |
| LCNEC-62 | TERT | AMP | 3.33 |
