# Supplementary material for: Next-Generation Sequencing of Pulmonary Large Cell Neuroendocrine Carcinoma Reveals Small Cell Carcinoma–like and Non–Small Cell Carcinoma–like Subsets
Source: Oxford University Press journal article supplement (doi:10.1158/1078-0432.ccr-15-2946), 2016-03-09
Supplement: 10780432ccr152946-sup-159141_1_supp_3352544_n2ddnn.docx [file 10780432ccr152946-sup-159141_1_supp_3352544_n2ddnn.docx]

**Supplementary Table 7: Detailed chemosensitivity data**

| **Patient ID** | **Molecular subtype** | **Smoking Pack Years** | **Age** | **Gender** | **Stage at diagnosis** | **Stage IV** | **First-line regimen** | **Response** | **RECIST % change*** |
| --- | --- | --- | --- | --- | --- | --- | --- | --- | --- |
| LCNEC-47 | SCLC-like | 50 | 65 | F | IA | recurrent | Carbo/Etop | PR | -0.51 |
| LCNEC-50 | NSCLC-like | 88 | 57 | F | IV | de-novo | Carbo/Taxol | SD | -0.27 |
| LCNEC-53 | SCLC-like | 70 | 54 | F | IIIA | recurrent | Carbo/Taxol/Bev | PR | -0.5 |
| LCNEC-34 | NSCLC-like | 40 | 58 | M | IA | recurrent | Cis/Pem | PD | +0.31 |
| LCNEC-59 | NSCLC-like | 0 | 67 | F | IB | recurrent | Paclitaxel | SD | na |
| LCNEC-61 | SCLC-like | 25 | 50 | M | IV | de-novo | Carbo/Pem | PR | -0.38 |
| LCNEC-39 | NSCLC-like | 62.5 | 79 | F | IA | recurrent | Carbo/Pem | SD | +0.09 |
| LCNEC-697 | SCLC-like | 45 | 70 | M | IIA | recurrent | Carbo/Taxol | SD | na |
| LCNEC-897 | NSCLC-like | 25 | 46 | F | IA | recurrent | Cis/Etop | PD | na |
| LCNEC-299 | NSCLC-like | 33 | 66 | M | IV | de-novo | Cis/Pem | SD | na |
| LCNEC-913 | carcinoid-like | 15 | 68 | M | IIIA | recurrent | Carbo/Pem | SD | -0.06 |

* Quantitative RECIST assessment of response was performed if scans were available for re-review; otherwise, non-RECIST determination of response was made based on review of the reported findings. PR partial response, SD stable disease, PD progressive disease
